# Supplementary material for: Rapid cleavage of the naphthylmethyl–oxygen bond in higher triplet excited states
Source: Royal Society of Chemistry journal article supplement (doi:10.1039/b308577e), 2003-01-01
Supplement: b308577e.doc [file b308577e.doc]

Supplementary information for:

Rapid cleavage of naphthylmethyl-oxygen bond in the higher triplet excited states

Xichen Cai, Masanori Sakamoto, Michihiro Hara, Sachiko Tojo, Mamoru Fujitsuka, Akihiko Ouchi, and Tetsuro Majima*

The Institute of Scientific and Industrial Research (SANKEN), Osaka University, Mihogaoka 8-1, Ibaraki, Osaka 567-0047, Japan. E-mail: [majima@sanken.osaka-u.ac.jp](mailto:majima@sanken.osaka-u.ac.jp)

National Institute of Advanced Industrial Science and Technology, 1-1-1, Higashi, Tsukuba, Ibaraki 305-8565, Japan

**I,** **1-Np(T1)CH2-OBP and 2-Np(T1)CH2-OBP**

Very similar transient absorptions to those of naphthalene(Np)(T1) and 1-methylnaphthalene(T1) of 1-Np(T1)CH2-OBP and 2-Np(T1)CH2-OBP at 395 and 420 nm were obtained when benzophenone(BP) was selected as the triplet sensitizer with 355-nm laser irradiation in Ar-saturated acetonitrile at room temperature. The peaks of 1-Np(T1)CH2-OBP and 2-Np(T1)CH2-OBP at 395 and 420 nm can be quenched by O2, and the peak intensity was almost same to that of Np(T1) at the same concentrations of Np and 1-NpCH2-OBP and 2-NpCH2-OBP. Therefore, it is reasonable to assume that the extinction coefficients (**) of 1-Np(T1)CH2-OBP and 2-Np(T1)CH2-OBP in cyclohexane are similar to that of Np(T1) in nonpolar solvents. We selected the value of 13200 M-1cm-1 of **420 for 1-Np(T1)CH2-OBP and 2-Np(T1)CH2-OBP.1

**II, The C-O bond cleavage of 2-NpCH2-OBP(Tn)**

Similar experimental results to those of 1-NpCH2-OBP(Tn) were obtained for 2-NpCH2-OBP(Tn). The bleaching of the transient absorption of 2-Np(T1)CH2-OBP at 420 nm and the formation of 2-NpCH2 radical at 380 nm were observed during the two-colour two-laser flash photolysis of 2-NpCH2-OBP (1.0  10-3 M) in Ar-saturated cyclohexane, Figs. S1-S3.





Fig. S1 Transient absorption spectra of 2-NpCH2-OBP obtained at 1 μs after the second 430-nm laser irradiation during the two-colour two-laser flash photolysis in Ar-saturated cyclohexane at room temperature, 355-nm laser only (a) (broken line), 355 and 430-nm lasers together (b) (solid line). The delay time between the first 355-nm laser and the second 430-nm laser irradiation was 100 ns. The inset shows spectrum obtained by (b)-(a) in the region of 350 - 400 nm.

Fig. S2 Kinetic traces illustrating the time profiles of O.D.420 during the two-colour two-laser flash photolysis of 2-NpCH2-OBP in Ar-saturated cyclohexane at room temperature.2 The delay time between the first 355-nm laser and the second 430-nm laser irradiation was 100 ns, the second 430-nm laser power was 0 (black), 5 (red), and 10 (blue lines) mJ pulse-1.

Fig. S3 Kinetic traces illustrating the time profiles of O.D.365 during the two-colour two-laser flash photolysis of 2-NpCH2-OBP in Ar-saturated cyclohexane at room temperature. The dotted line shows the corrected O.D.380 for 2-NpCH2. The delay time between the first 355-nm laser and the second 430-nm laser irradiation was 100 ns, the second 430-nm laser power was 0 and 10 mJ pulse-1.

The rapid formation of the transient absorption at 420 and 380 nm after the first 355-nm laser irradiation corresponds to the formation of 2-Np(T1)CH2-OBP. The change of the transient absorption at 380 nm by the second 430-nm laser irradiation involves the effects of both the bleaching of 2-Np(T1)CH2-OBP and the formation of 2-NpCH2.

The concentration of 2-NpCH2 was calculated to be 1.9  10-6 M from |O.D.420|, |O.D.380|, **420 of 13200 M-1cm-1 for 2-Np(T1)CH2-OBP,1 and **380 of 5000  300 M-1cm-1 for 2-NpCH2.3 This indicates that 2-Np(T1)CH2-OBP disappeared was converted stoichiometrically to 2-NpCH2 through the cleavage of the C-O bond of 2-NpCH2-OBP(Tn). Plotting |O.D.420|vs 430-nm laser power, the linear line was obtained as shown in Fig. S4. Therefore, the quantum yield of 2-NpCH2 (**) was calculated to be 0.020  0.002 from the slope of the line and ** of 13200 M-1cm-1.1

Fig. S4 Plots of |O.D.420| vs the 430-nm laser power (*I*).

The mechanism of the C-O bond cleavage of 2-NpCH2-OBP is shown in Scheme S1

Scheme S1 Two-colour two-laser flash photolysis of 2-NpCH2-OBP in Ar-saturated cyclohexane at room temperature. The dotted squares show the predominat energy location. ISC: Intersystem crossing. EM: Energy migration.

**Notes and references**

1. S. L. Murov; I. Carmichael; G. L. Hug *Handbook of Photochemistry*; Marcel Dekker, Inc.: New York, 1993.
2. In order to show the time profiles clearly, 20 times average data of the original one were given here. Therefore, the time ranges of bleaching of the transient absorption at 420 nm and formation at 365 nm or 380 nm were appeared to be longer than 5 ns. In fact the bleaching and formation of the transient absorption occurred within laser duration (5 ns). This average has no effect on the calculation of the quantum yield of 1-NpCH2**.** and 2-NpCH2**.** radicals.
3. S. Watanabe; M. Nagano; T. Suzuki; T. Ichimura. *J. Photochem. Photobiol., A* 2000, **137**, 125.
